# Supplementary material for: Facile assembly of novel g-C3N4@expanded graphite and surface loading of nano zero-valent iron for enhanced synergistic degradation of tetracycline
Source: Royal Society of Chemistry journal article supplement (doi:10.1039/c9ra06620a), 2019-01-01
Supplement: c9ra06620a1.pdf [file c9ra06620a1.pdf]

## **Facile assembly of novel g-C<sub>3</sub>N<sub>4</sub>@expanded graphite and surface loading of nano zerovalent iron for enhanced synergistic degradation of tetracycline**

Xiangyu Wang<sup>a, \*</sup>, Yu Xie<sup>a</sup>, Jun Ma<sup>b</sup>, Ping Ning<sup>a, \*</sup>

<sup>a</sup> Faculty of Environmental Science and Engineering, Kunming University of Science and Technology, Kunming, 650500, China

<sup>b</sup> State Key Laboratory of Urban Water Resources and Environment, Harbin Institute of Technology, Harbin, 150090, China

Corresponding authors' E-mail addresses: ningping58\_2015@sina.com (P. Ning), imusthlee2014@sina.com (X. Y. Wang).

### **Table of Contents**

1. The magnetic hysteretic curve of Fe/CN@E-3. **(Fig. S1)**
2. ESR spectra radicals trapped by DMPO recorded at room temperature under dark and visible light irradiation: (a) DMPO-·O<sub>2</sub><sup>-</sup> response; (b) DMPO-·OH response. **(Fig. S2)**

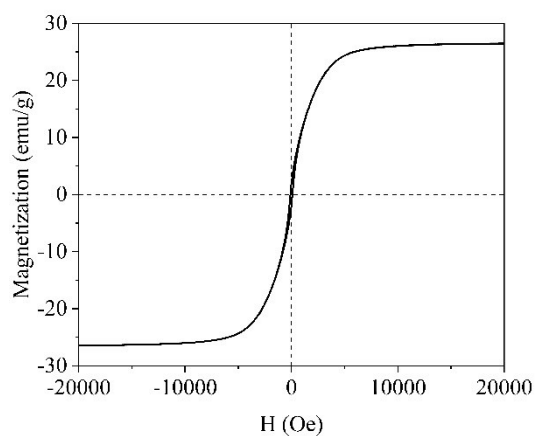

**Fig. S1** The magnetic hysteresis curve of Fe/CN@E-3.

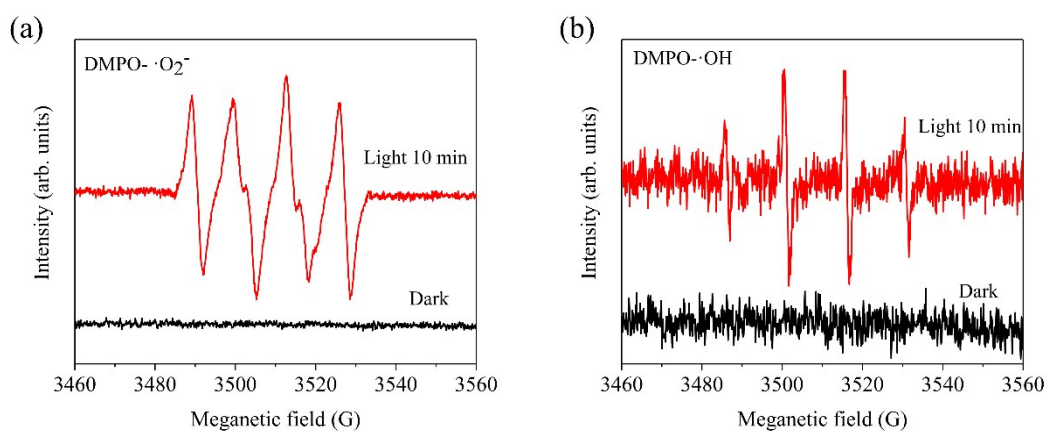

**Fig. S2** ESR spectra radicals trapped by DMPO recorded at room temperature under dark and visible light irradiation: (a) DMPO- $\cdot\text{O}_2^-$  response; (b) DMPO- $\cdot\text{OH}$  response.
